# Supplementary material for: Pen-writing high-quality perovskite films and degradable optoelectronic devices
Source: Royal Society of Chemistry journal article supplement (doi:10.1039/d1ra09128j), 2022-01-01
Supplement: d1ra09128j2.pdf [file d1ra09128j2.pdf]

## Supplementary Information

### Pen-writing high-quality perovskite films and degradable optoelectronic devices

Ting Zhang<sup>a</sup>, Shasha Zhang<sup>a</sup>, Zhenkun Gu<sup>\*a</sup>, Rudai Zhao<sup>a</sup>, Shiheng Wang<sup>a</sup>, Lutong Guo<sup>b,c</sup>, Tiesheng Li<sup>a</sup>,  
Yiqiang Zhang<sup>a</sup>, Yanlin Song<sup>\*b,c</sup>

<sup>a</sup> Green Catalysis Center, and College of Chemistry, Henan Institute of Advanced Technology, Zhengzhou University, Zhengzhou 450051, China.

<sup>b</sup> Key Laboratory of Green Printing, Institute of Chemistry, Chinese Academy of Sciences, Beijing 100190, China.

<sup>c</sup> University of Chinese Academy of Sciences, Beijing 100049, China.

\*Corresponding authors.

E-mail addresses: ylsong@iccas.ac.cn, guzhenkun@zzu.edu.cn

#### Supplementary Materials:

Supplementary Figure 1-7

Supplementary Table 1-2

Supplementary Movie 1

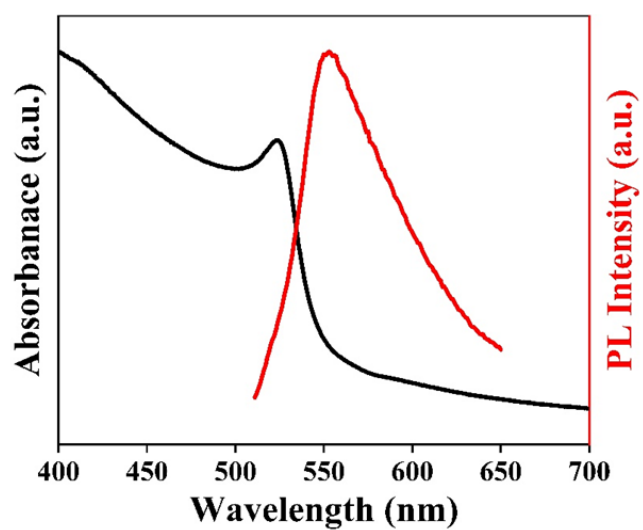

**Fig. S1** Visible absorption and photoluminescence (PL) spectra of the prepared  $\text{CH}_3\text{NH}_3\text{PbBr}_3$  films by spin-coating.

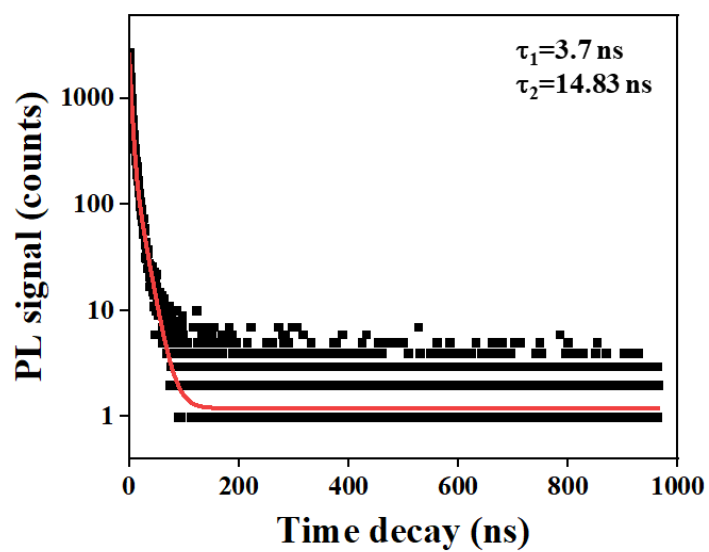

**Fig. S2** PL time decay trace of the  $\text{CH}_3\text{NH}_3\text{PbBr}_3$  films by spin-coating at 405 nm showing a fast component ( $\tau_1 = 3.7$  ns) and a slow component ( $\tau_2 = 14.83$  ns).

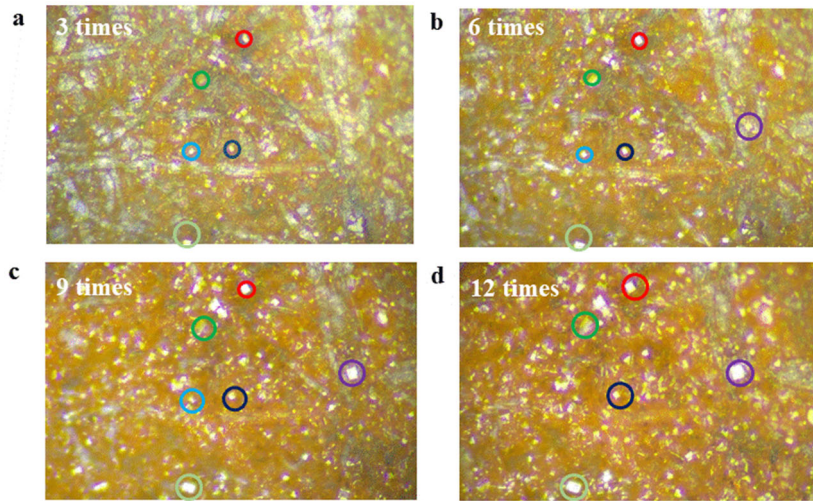

**Fig. S3** In-situ growth process of the pen-written  $\text{CH}_3\text{NH}_3\text{PbBr}_3$  films at different writing cycles. a) 3 times. b) 6 times. c) 9 times. d) 12 times. Circles of the same color represent the crystal of different times. The film coverage and crystal size are positively related with writing times. As the writing times increase, the coverage and crystal size increase.

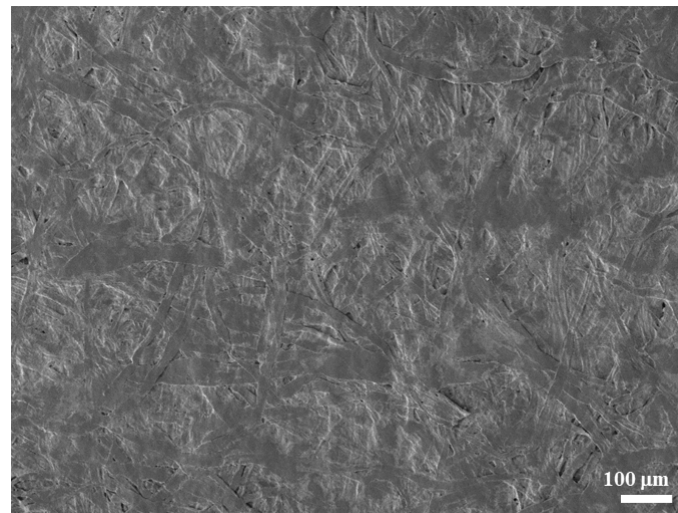

**Fig. S4** SEM image of the  $\text{CH}_3\text{NH}_3\text{PbBr}_3$  perovskite films by spin-coating.

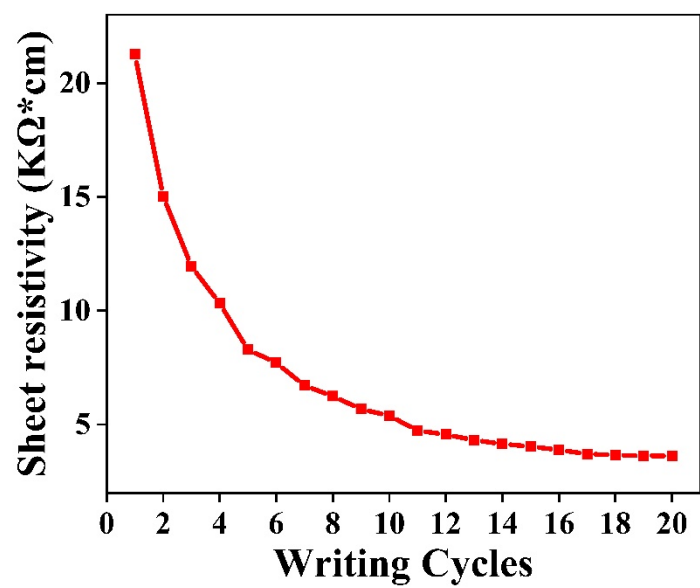

**Fig. S5** The resistivity of pencil-drawn graphite electrodes on papers as a function of writing cycles.

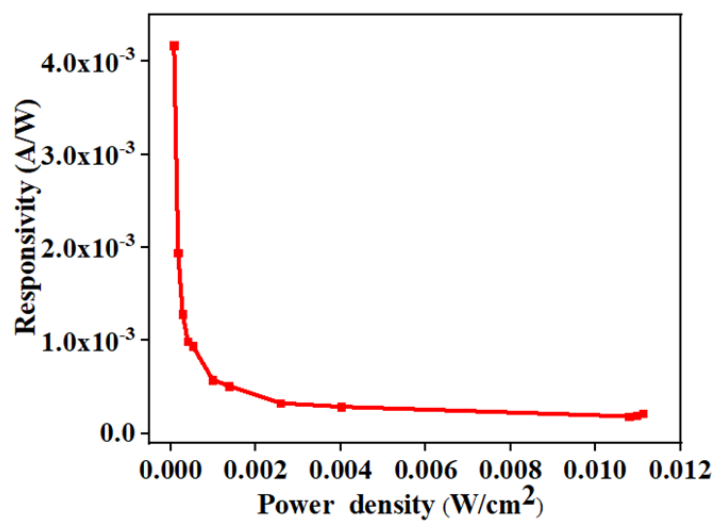

**Fig. S6** Responsivity of the pen-written photodetectors (bias, 4 V;  $\lambda = 405$  nm).

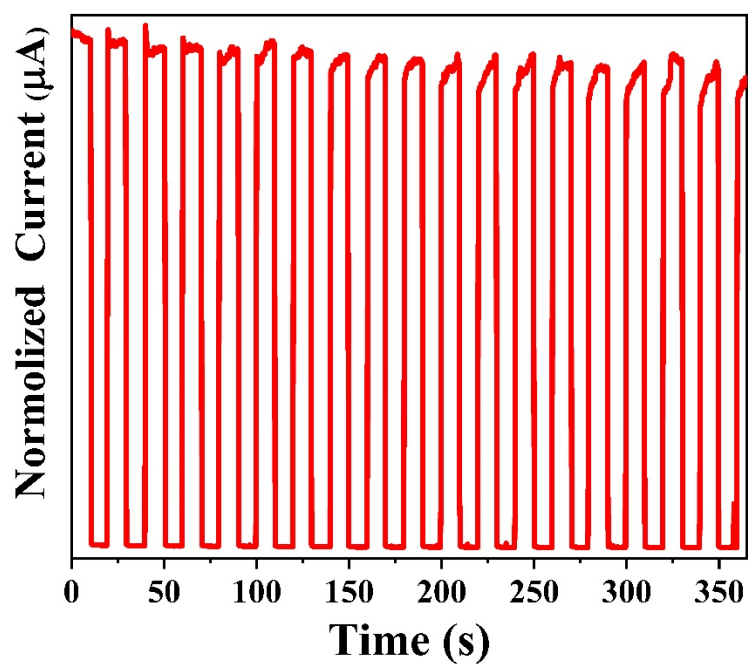

**Fig. S7** Photoswitching behavior of the photodetector.

| Device type                                                                    | Wavelength (nm) | On/off current ration | Responsivity [mA/W]        | References                                         |
|--------------------------------------------------------------------------------|-----------------|-----------------------|----------------------------|----------------------------------------------------|
| Cs <sub>2</sub> NaBiCl <sub>6</sub> /ITO                                       | 365             | 25                    | 67.98@1.5V                 | J. Phys. Chem. Lett. 2021, 12, 5682–5688.          |
| Au/Cs <sub>3</sub> Cu <sub>2</sub> I <sub>5</sub> /SiO <sub>2</sub>            | 265             | 22                    | 22.1@3V                    | J. Phys. Chem. Lett. 2020, 11, 16, 6880–6886.      |
| MAPbBr <sub>3</sub> /InGa/SiO <sub>2</sub>                                     | 532             | 100                   | 0.45 × 10 <sup>3</sup> @2V | ACS Appl. Mater. Interfaces 2018, 10, 25763-25769. |
| MAPbI <sub>3</sub> /graphite/paper                                             | 633             | 32                    | 4.4@5V                     | ACS Appl. Mater. Interfaces, 2017, 9, 10921–10928. |
| Au/CH <sub>3</sub> NH <sub>3</sub> PbI <sub>x</sub> Cl <sub>3-x</sub> :PCBM/Au |                 | 100                   | 23@5V                      | ACS Appl. Mater. Interfaces, 2017, 9, 15638–15643. |
| MAPbBr <sub>3</sub> / graphite /paper                                          | 405             | 10 <sup>2</sup>       | 4.2@3 V                    | This work                                          |

**Table S1** Device performance of perovskite-based photodetectors.

| Perovskite films                                                        | $\tau_1$ (ns)     | $\tau_2$ (ns)      | $A_1$   | $A_2$  | $A_0$ | $\chi^2$ |
|-------------------------------------------------------------------------|-------------------|--------------------|---------|--------|-------|----------|
| CH <sub>3</sub> NH <sub>3</sub> PbBr <sub>3</sub> films by pen-writing  | 29.02<br>(65.00%) | 186.65<br>(35.00%) | 3580.94 | 299.77 | 0.75  | 1.094    |
| CH <sub>3</sub> NH <sub>3</sub> PbBr <sub>3</sub> films by spin-coating | 3.7<br>(66.22%)   | 14.83<br>(33.78%)  | 2617.4  | 333.04 | 1.201 | 0.864    |

**Table S2** The parameters for fluorescence lifetime of CH<sub>3</sub>NH<sub>3</sub>PbBr<sub>3</sub> films. The photoluminescence decay graph is fitted by a bi-exponential function “ $F(t) = A_0 + A_1 e^{(-t/\tau_1)} + A_2 e^{(-t/\tau_2)}$ ”, where  $F(t)$  is the decay model;  $A_0$ ,  $A_1$ , and  $A_2$  are constants;  $\tau_1$  and  $\tau_2$  are the lifetime components.
